# Supplementary material for: Inhibitory Effect of Curcumin-Cu(II) and Curcumin-Zn(II) Complexes on Amyloid-Beta Peptide Fibrillation
Source: Hindawi journal article supplement (doi:10.1155/2014/325873), 2014-01-01
Supplement: f1 [file 325873.f1.pdf]

Supplementary files:

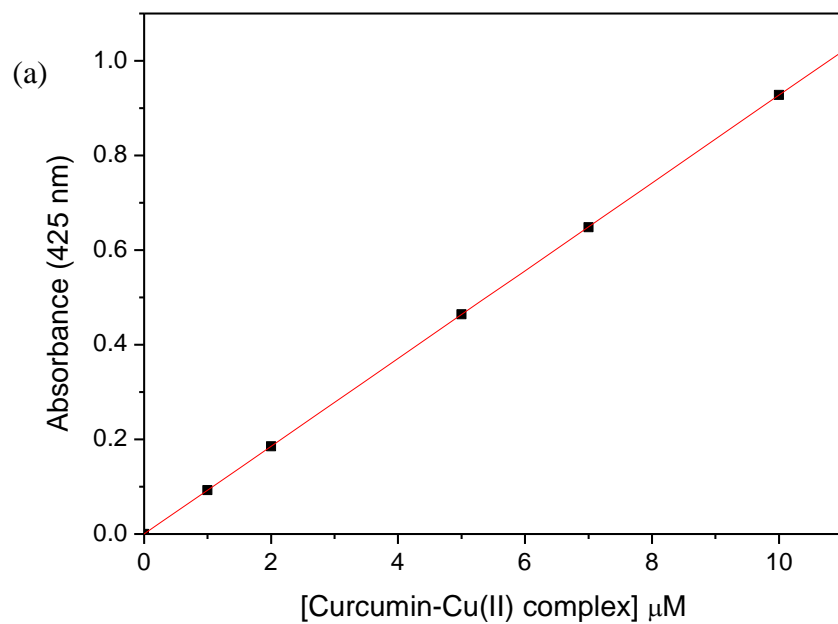

(a) Plot of Concentration vs Absorbance (425nm) for Curcumin-Cu(II) complex.

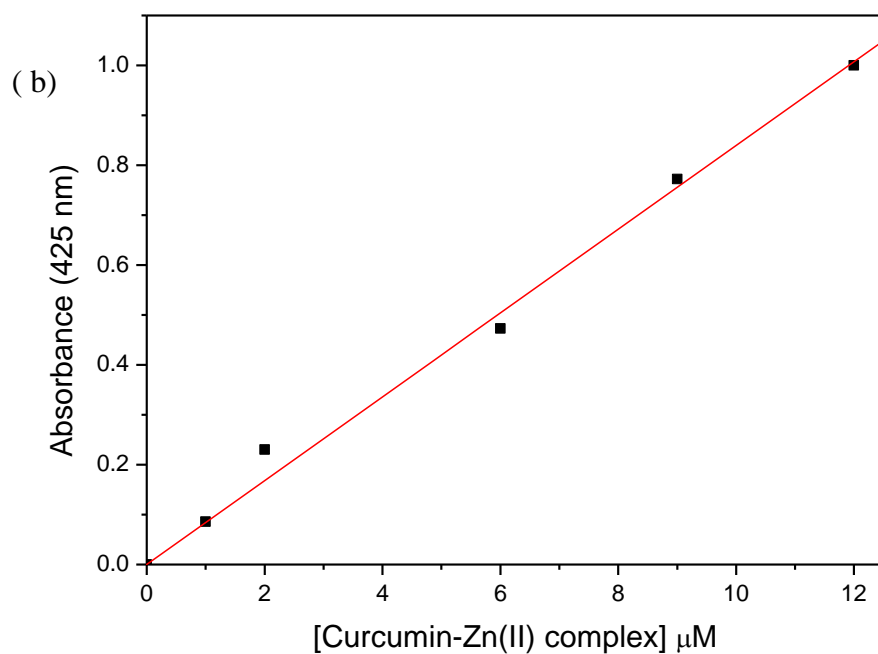

(b) Plot of Concentration vs Absorbance (425nm) for Curcumin-Zn(II) complex.

(c)

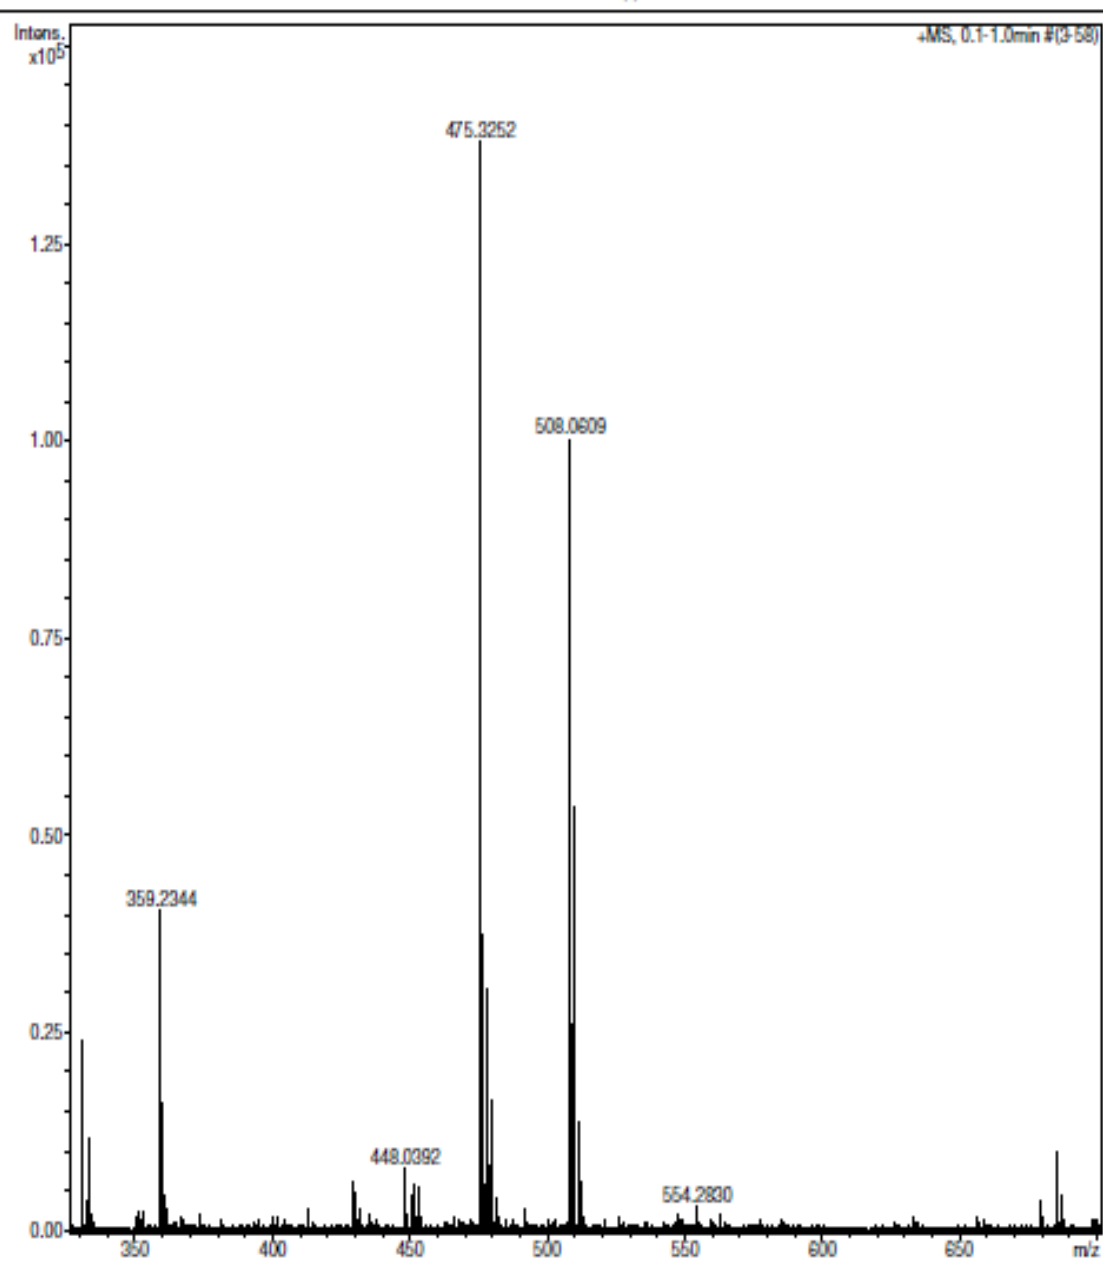

(c) ESI-Mass spectra of Curcumin-Cu(II) complex.

(d)

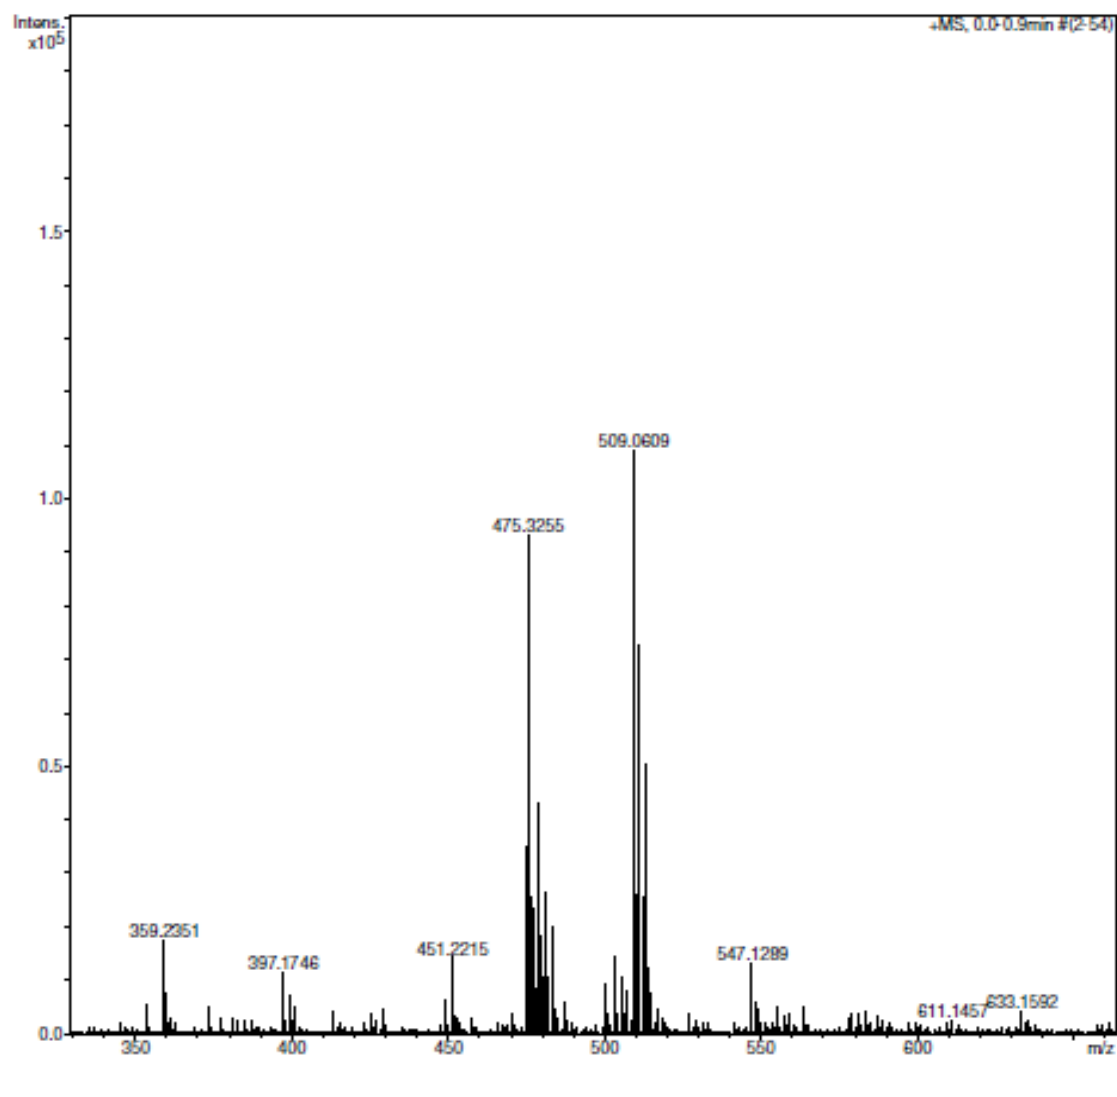

(d) ESI-Mass spectra of Curcumin-Zn(II) complex.
